# Supplementary material for: Epibiotic Fungal Communities of Three Tomicus spp. Infesting Pines in Southwestern China
Source: MDPI journal article supplement (doi:10.3390/microorganisms8010015), 2019-12-20
Supplement: s1 [file s1]

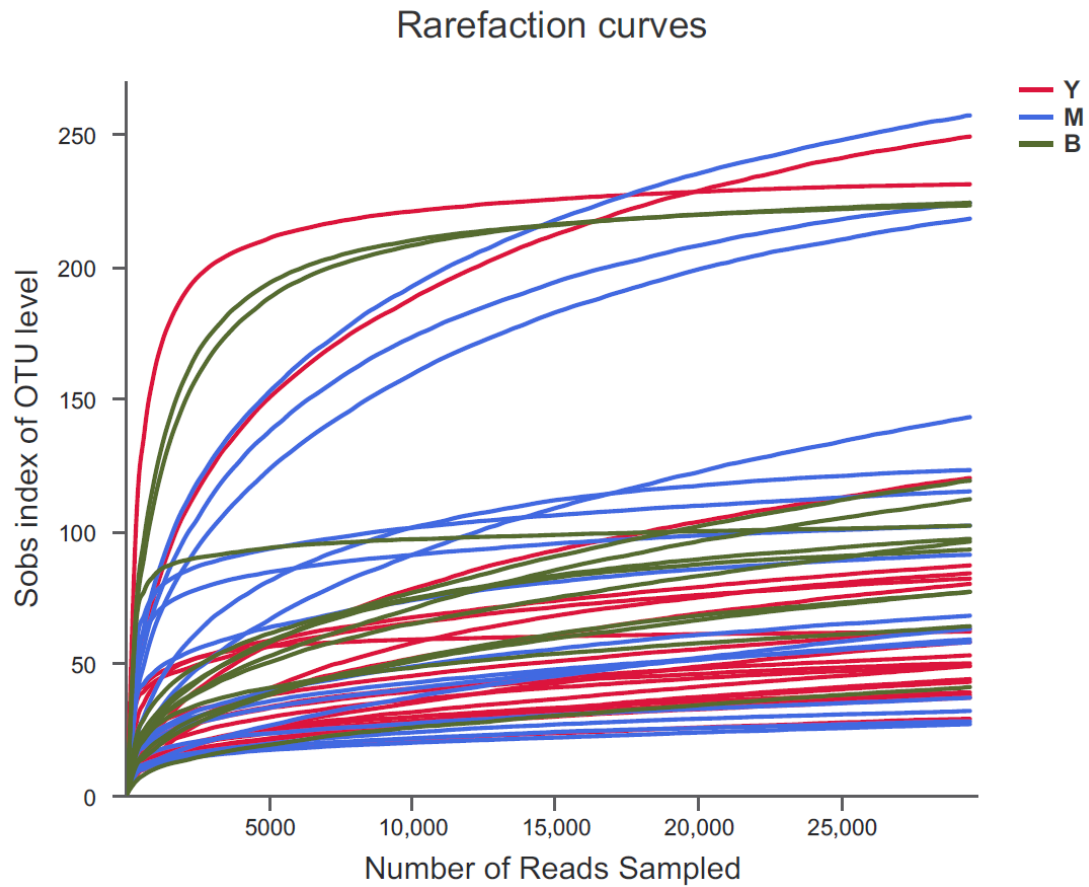

**Supplementary Figure S1** | Rarefaction curves of the 48 samples. Different colors represent distinct bark beetles.

Y = *T. yunnanensis*; M = *T. minor*; B = *T. brevipilosus*.
