# Supplementary figures and images for: Epibiotic Fungal Communities of Three Tomicus spp. Infesting Pines in Southwestern China
Source: MDPI journal article supplement (doi:10.3390/microorganisms8010015), 2019-12-20

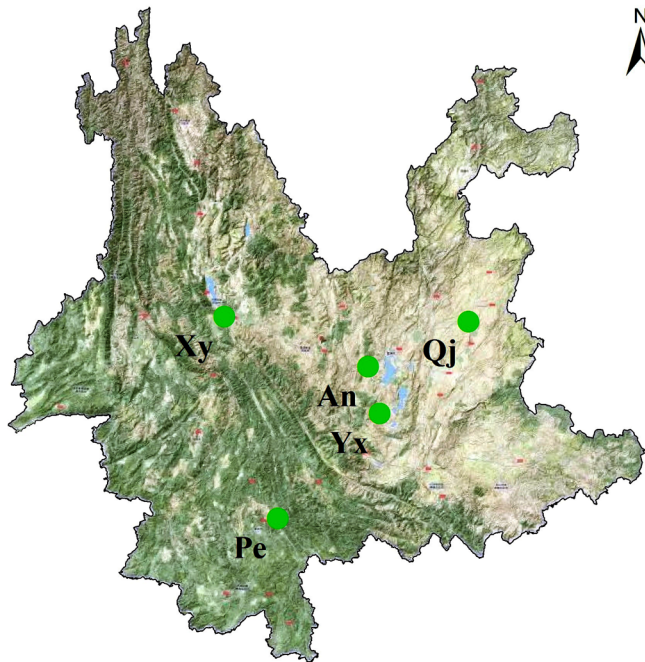

**Yunnan, China**

100 km

Supplement: s1 [file s1]
